# Supplementary material for: An image analysis pipeline for automated classification of imaging light conditions and for quantification of wheat canopy cover time series in field phenotyping
Source: PubMed Central journal article supplement (PMC5361853; doi:10.1186/s13007-017-0168-4), 2017-03-21
Supplement: 13007_2017_168_MOESM1_ESM.pdf [file 13007_2017_168_MOESM1_ESM.pdf]

1 **Additional file 1**

2 Three segmentation quality measures described in the way of calculation of pixel counts based on  
3 segmentation and segmentation reference masks:

$$Q_{seg} = \frac{S_{plant} \cap R_{plant} + S_{soil} \cap R_{soil}}{R_{plant} + R_{soil}}$$

$$Sr = \frac{S_{plant} \cap R_{plant}}{R_{plant}}$$

$$ES = \frac{S_{plant} \cap R_{soil} + S_{soil} \cap R_{plant}}{R_{plant}}$$

4 Here, the S and R denote the computer segmented image and reference segmentation image.

5

6

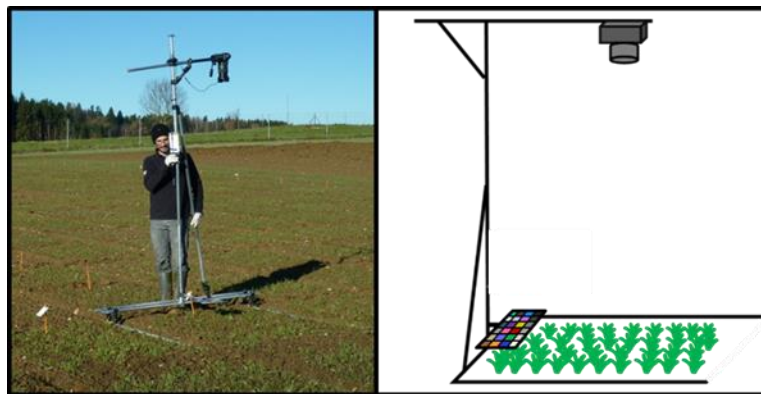

7

8 **Fig. S1. Imaging setup for measuring canopy cover using a DSLR camera mounted on a custom-made**  
9 **aluminium frame. The linear distance between the camera and ground is ~2 m.**

10

11

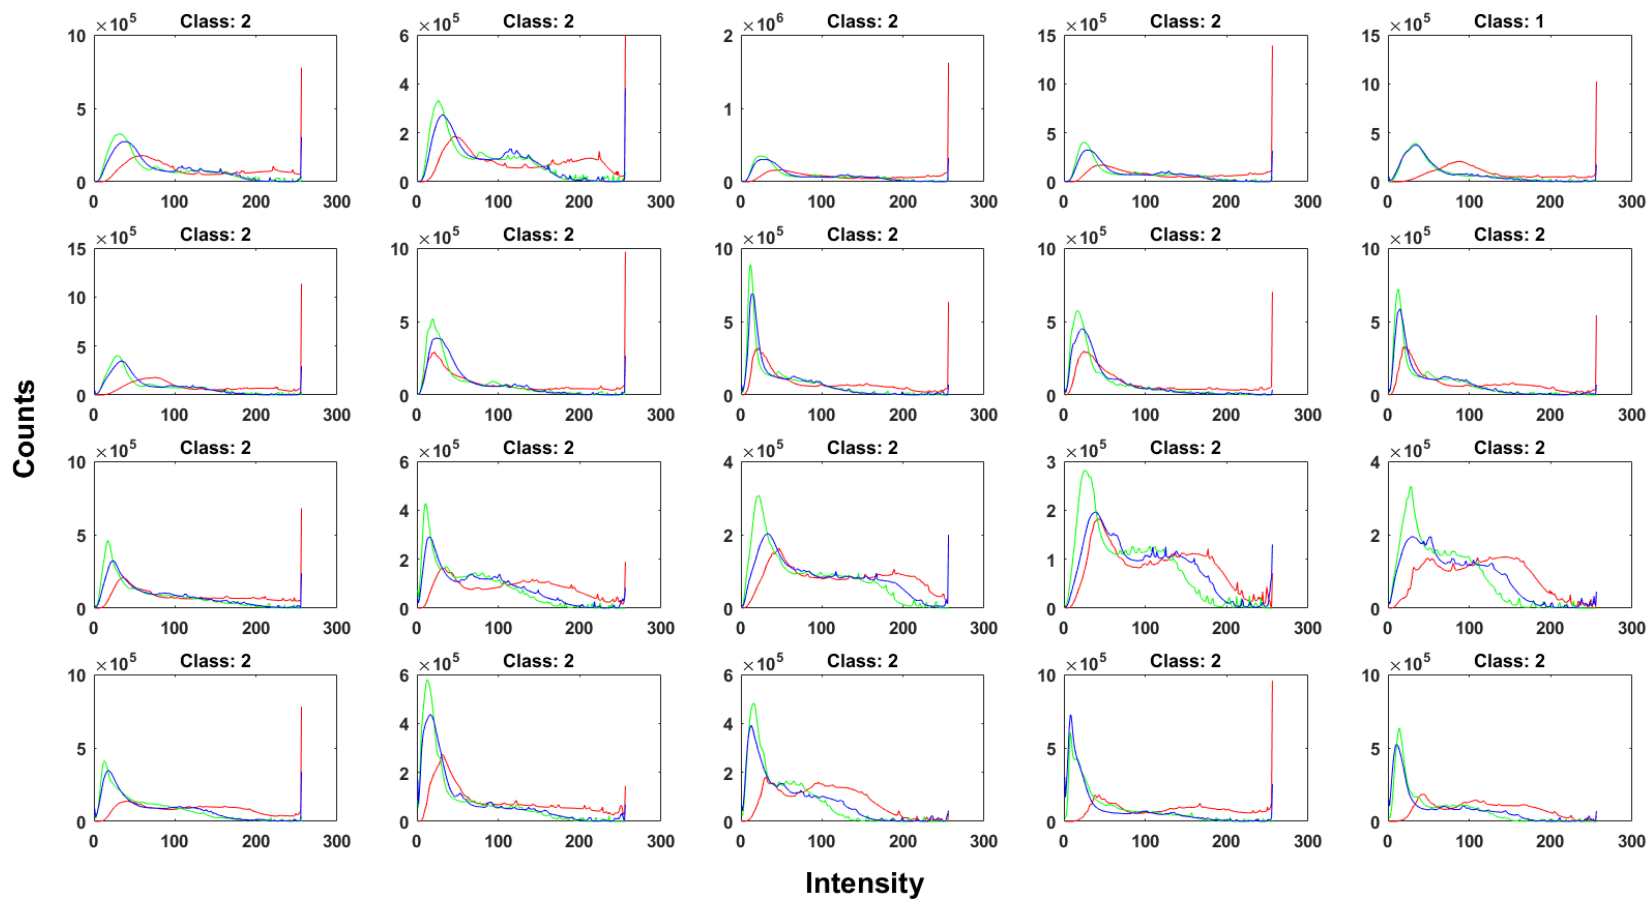

12

13 **Fig. S2. SVM-based illumination classification on the new data set of 20 HLC images (Class 2). The model correctly predicted the light conditions for 19 images, with**  
 14 **an accuracy of 95%.**

15

16

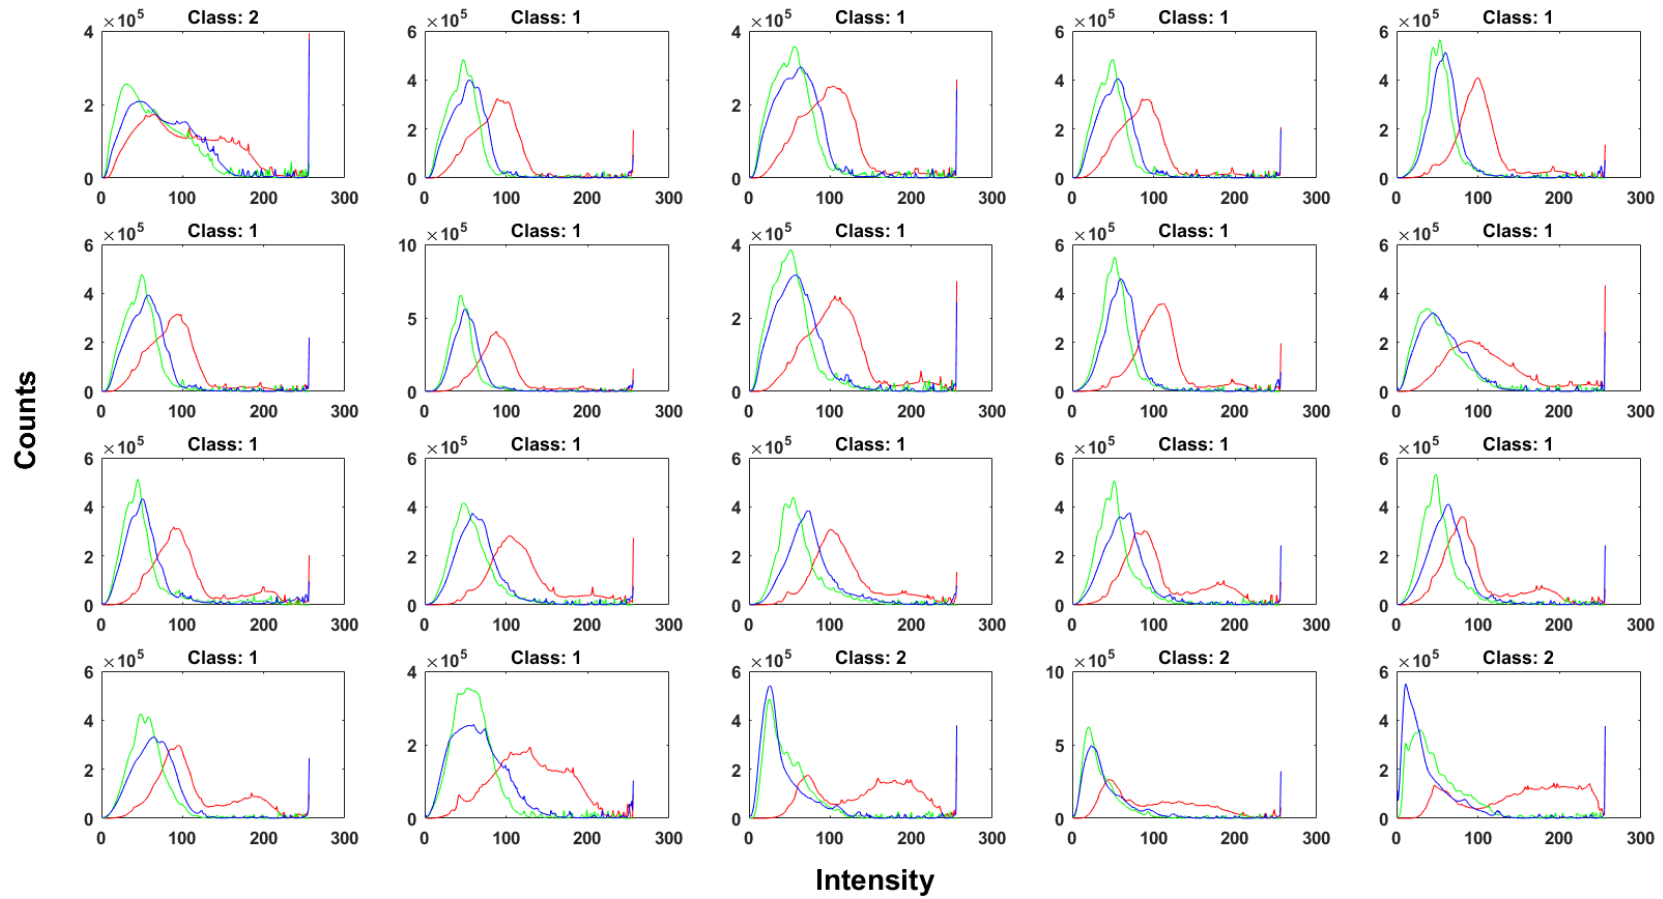

17

18 **Fig. S3. SVM-based illumination classification on the new data set of 20 LLC images (Class 1). The model correctly predicted the light conditions for 16 images, with an**  
 19 **accuracy of 80%.**

20

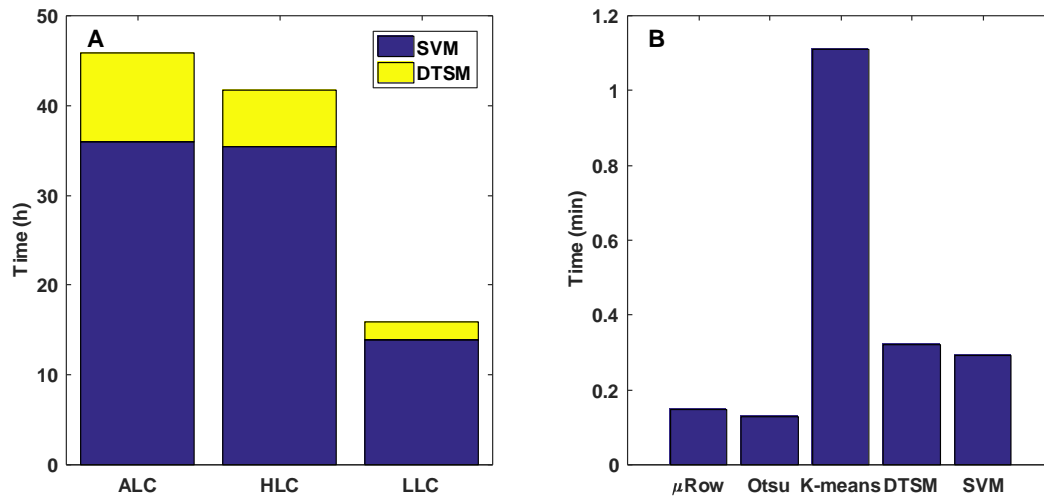

21

22 **Fig. S4. Training time (hours) for the three types of models for ALC, HLC and LLC images (A) based on**  
 23 **DT and SVM methods, and they were compared with  $\mu$ Row, Otsu and K-means clustering in computing**  
 24 **time (minutes) for segmentation of one image (B).**

25

26

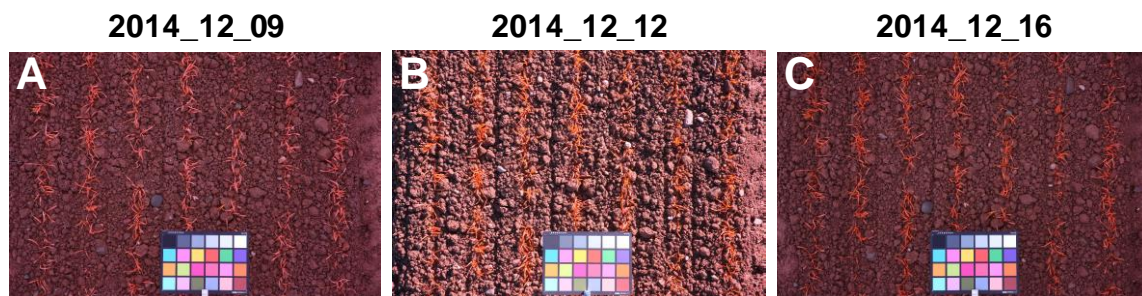

27

28 **Fig. S5. Images taken on three different days under different light conditions. The canopy cover extracted**  
 29 **from images for the day 2014-12-12 (B) yielded low correlations with the (A) previous and (C) following**  
 30 **days.**

31

32

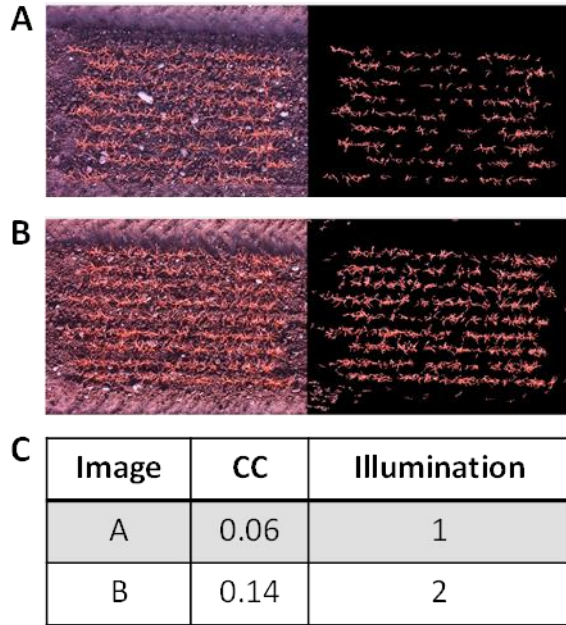

33

34 **Fig. S6. Image specific flags for illumination conditions could be used as a metadata item and serve as a**  
 35 **filter when evaluating the canopy cover results in high throughput field phenotyping.**

36

37

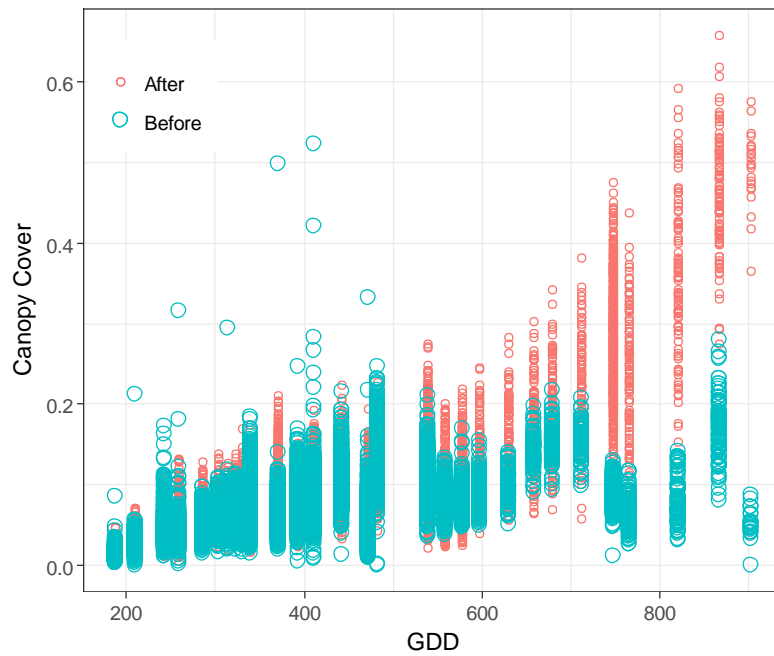

38

39 **Fig. S7. Comparison of the segmentation results for canopy cover in relation to growing degree days**  
 40 **(GDD) before and after the use of the proposed image analysis pipeline.**
